# Supplementary material for: Modeling the metastable dynamics of correlated structures
Source: PubMed Central journal article supplement — Sci Rep. 2015 Jan 27;5:8005. doi: 10.1038/srep08005 (PMC4306916; doi:10.1038/srep08005), 2015-01-27
Supplement: srep08005-s1.pdf [file srep08005-s1.pdf]

# Modeling the metastable dynamics of correlated structures (supplementary materials)

Alexey M. Shakirov,<sup>1,2,\*</sup> Sergey V. Tsibulsky,<sup>1</sup> Andrey E.  
Antipov,<sup>3</sup> Yulia E. Shchadilova,<sup>2</sup> and Alexey N. Rubtsov<sup>1,2</sup>

<sup>1</sup>*Department of Physics, M.V. Lomonosov Moscow State University, 119992 Moscow, Russia*

<sup>2</sup>*Russian Quantum Center, 143025 Skolkovo, Moscow region, Russia*

<sup>3</sup>*University of Michigan, Ann Arbor, MI 48109, U.S.A.*

## Master equation

We derive the master equation  $\dot{\rho}_S(t) = -i[H_S, \rho_S(t)] - \mathcal{L}\rho_S(t)$  for the reduced density matrix of an open quantum system. First we substitute  $H_E = \sum_k \varepsilon_k c_k^\dagger c_k$  and  $H_I = \sum_{\alpha k} (\gamma_{\alpha k} c_\alpha^\dagger c_k + \gamma_{\alpha k}^* c_k^\dagger c_\alpha)$  into

$$\frac{d}{dt}\rho_S(t) = -i[H_S, \rho_S(t)] - \int_0^\infty dt' \text{tr}_E [H_I, [e^{-i(H_S+H_E)t'} H_I e^{i(H_S+H_E)t'}, \rho_S(t)\rho_E]] \quad (1)$$

and clarify the action of operator exponents

$$e^{-iH_E t} c_k e^{iH_E t} = e^{i\varepsilon_k t} c_k \quad e^{-iH_S t} c_\alpha e^{iH_S t} = \sum_{mn} \langle m|c_\alpha|n\rangle e^{-i(E_m - E_n)t} |m\rangle \langle n| \quad (2)$$

Here  $|n\rangle$ ,  $E_n$  are eigenstates and eigenenergies of  $H_S$  obtained by an exact diagonalization. We assume that  $\rho_E$  is a Gibbs state and leave only terms with pairs of reservoir operators which do not vanish after taking partial trace. This transforms the non-Liouvillian part into

$$\mathcal{L}\rho_S(t) = \int_0^\infty dt' \text{tr}_E \sum_{\substack{\alpha\beta k \\ mn}} e^{i(E_n - E_m - \varepsilon_k)t'} [\gamma_{\alpha k} c_\alpha^\dagger c_k, [\gamma_{\beta k}^* \langle m|c_\beta|n\rangle c_k^\dagger |m\rangle \langle n|, \rho_S(t)\rho_E]] + \text{h.c.} \quad (3)$$

Taking time integral and partial trace leads to

$$\begin{aligned} \mathcal{L}\rho_S(t) = & \pi \sum_{\substack{\alpha\beta k \\ mn}} \delta(E_n - E_m - \varepsilon_k) \gamma_{\alpha k} \gamma_{\beta k}^* \langle m|c_\beta|n\rangle (\bar{f}_k c_\alpha^\dagger |m\rangle \langle n| \rho_S(t) - \\ & - f_k c_\alpha^\dagger \rho_S(t) |m\rangle \langle n| - \bar{f}_k |m\rangle \langle n| \rho_S(t) c_\alpha^\dagger + f_k \rho_S(t) |m\rangle \langle n| c_\alpha^\dagger) + \text{h.c.} \end{aligned} \quad (4)$$

---

\*Correspondence should be addressed to a.shakirov@rqc.ru

Here  $\text{tr}_E(c_k^\dagger c_k \rho_E) = f(\varepsilon_k) = (\exp(\frac{\varepsilon_k - \mu}{T}) + 1)^{-1}$  is a distribution function of particles in the reservoir and  $\text{tr}_E(c_k c_k^\dagger \rho_E) = \bar{f}(\varepsilon_k) = (1 + \exp(-\frac{\varepsilon_k - \mu}{T}))^{-1}$ . We also introduce hybridization function  $J_{\alpha\beta}(\varepsilon) = 2\pi \sum_k \gamma_{\alpha k} \gamma_{\beta k}^* \delta(\varepsilon - \varepsilon_k)$  which allows to rewrite the last expression in the following form

$$\begin{aligned} \mathcal{L}\rho_S(t) = & \frac{1}{2} \sum_{\substack{\alpha\beta \\ mn}} J_{\alpha\beta}(\varepsilon_{nm}) \langle m|c_\beta|n\rangle (\bar{f}(\varepsilon_{nm}) c_\alpha^\dagger |m\rangle \langle n| \rho_S(t) - \\ & - f(\varepsilon_{nm}) c_\alpha^\dagger \rho_S(t) |m\rangle \langle n| - \bar{f}(\varepsilon_{nm}) |m\rangle \langle n| \rho_S(t) c_\alpha^\dagger + f(\varepsilon_{nm}) \rho_S(t) |m\rangle \langle n| c_\alpha^\dagger) + \text{h.c.} \end{aligned} \quad (5)$$

We note that the matrix structure of  $J_{\alpha\beta}(\varepsilon)$  is determined by a hybridization of the reservoir with different localized states. Its dependence on energy is ignored in the wide band approximation. Then we introduce two kinds of transition operators

$$L_\alpha = \sum_{mn} f(\varepsilon_{nm}) \langle m|c_\alpha|n\rangle |m\rangle \langle n| \quad \bar{L}_\alpha = \sum_{mn} \bar{f}(\varepsilon_{nm}) \langle m|c_\alpha|n\rangle |m\rangle \langle n| \quad (6)$$

They allow to simplify (5) and finally write the master equation as

$$\begin{aligned} \frac{d}{dt} \rho_S(t) = & -i[H_S, \rho_S(t)] + \frac{1}{2} \sum_{\alpha\beta} J_{\alpha\beta} (c_\alpha^\dagger \rho_S(t) L_\beta + \bar{L}_\beta \rho_S(t) c_\alpha^\dagger - \\ & - c_\alpha^\dagger \bar{L}_\beta \rho_S(t) - \rho_S(t) L_\beta c_\alpha^\dagger) + \text{h.c.} \end{aligned} \quad (7)$$

We note that this derivation is also applicable to bosons if one uses  $f(\varepsilon_k) = (\exp(\frac{\varepsilon_k - \mu}{T}) - 1)^{-1}$  and  $\bar{f}(\varepsilon_k) = (1 - \exp(-\frac{\varepsilon_k - \mu}{T}))^{-1}$ .
